# Supplementary material for: Highly stable and controllable lasing actions from PVDF encapsulated CsPbBr3 perovskite microcrystals
Source: Royal Society of Chemistry journal article supplement (doi:10.1039/d2tc03148e), 2022-01-01
Supplement: d2tc03148e4.pdf [file d2tc03148e4.pdf]

## High-stable and controllable lasing actions from PVDF encapsulated

### CsPbBr<sub>3</sub> perovskite microcrystals

Lin Nie<sup>1</sup>, Xue Yu<sup>2,\*</sup>, Yicen Ge<sup>1</sup>, Dongxu He<sup>1</sup>, Xuanyu Zhu<sup>1</sup>, Haoze Liu<sup>1</sup>, Haihong Guo<sup>1</sup>, Feng Zhao<sup>2</sup>, Siufung Yu<sup>4,\*</sup>, Jianbei Qiu<sup>3</sup>, Xuhui Xu<sup>3,\*</sup>, Ting Wang<sup>1,4,\*</sup>

<sup>1</sup>College of Materials and Chemistry & Chemical Engineering, Chengdu University of Technology, Chengdu 610059, China

<sup>2</sup> School of Mechanical Engineering, Institute for Advanced Study, Institute for Advanced Materials Deformation and Damage from Multi-Scale, Chengdu University, Chengdu, 610106, P. R. China

<sup>3</sup> Faculty of Materials Science and Engineering, Key Laboratory of Advanced Materials of Yunnan Province, Kunming University of Science and Technology, Kunming, 650093, Yunnan, P. R. China.

<sup>4</sup>The Department of Applied Physics, The Hong Kong Polytechnic University, Hong Kong 999999, China

Email address: [wangtkm@foxmail.com](mailto:wangtkm@foxmail.com) (WT); [yuyu6593@126.com](mailto:yuyu6593@126.com) (YX); [xuxuh07@126.com](mailto:xuxuh07@126.com) (XXH); [sfyu21@hotmail.com](mailto:sfyu21@hotmail.com) (SFY)

## **Experimental sections:**

*Raw Materials:* Caesium bromide (CsBr, 99.90%, Aladdin), lead (II) bromide (PbBr<sub>2</sub>, 99.99%, Aladdin), N,N-dimethylformamide (DMF, 99.80%, Aladdin), and Polyvinylidene fluoride (PVDF, Aladdin). All raw materials were used as received without further purification.

*Preparation of precursor colloidal solution:* 0.20 mmol of CsBr and PbBr<sub>2</sub> were added to 5 mL DMF, respectively, and stirred on a magnetic heating stirrer until completely dissolved to prepare the CsPbBr<sub>3</sub> precursor. Then 1 g PVDF was added to 10 mL DMF, and magnetically stirred at 120 °C until it was completely dissolved into a transparent solution. Then, 2 mL of the CsPbBr<sub>3</sub> precursor solution and PVDF colloidal solution (DMF as a solvent) were thoroughly mixed at 120 °C to prepare the precursor colloidal solution.

*In situ growth CsPbBr<sub>3</sub> microcrystals in PVDF:* the above-mentioned precursor colloidal solution (1 g) was coated on a glass substrate to form a precursor solution layer with uniform thickness. Then, the glass substrate with precursor solution coating was placed into a heater at a high temperature (40-80°C) to accelerate the evaporation of DMF with the promotion of the crystallization of the perovskite microcrystals from the PVDF matrix. After holding onto a heating stage for 30 min, a bright green-emitting CsPbBr<sub>3</sub>@PVDF composite film was formed.

*Materials Characterization:* Powder XRD data were recorded on a Bruker AXS D2 phaser with graphite-monochromatized Cu K $\alpha$  radiation (1.5406 Å). Transmission electron microscopy was performed on a JEOL-JEM 2100F transmission electron microscope operating at an acceleration voltage of 200 kV. SEM images and elemental mapping analysis were captured with a JEOL Field Emission SEM. The absorption curves were measured using a HITACHI U-4100 UV-vis-NIR spectrophotometer with BaSO<sub>4</sub> as a standard reference. PL spectra were collected by a Hitachi F-7000 fluorescence spectrophotometer. Time-resolved photoluminescence (TRPL) decay kinetics were collected using a TCSPC module (Pico Harp 300) and a SPAD detector (IDQ, id100).

*Optical measurement:* The lasing emission of the CsPbBr<sub>3</sub> microparticles wrapped by PVDF under 800 nm femtosecond (fs) pulsed laser excitation. Here, a Ti: sapphire laser (coherent Libra) was used as the excitation source and used to generate the 800 nm fs pulses (1kHz). The samples were placed on an X-Y-Z translation stage of a dark-field optical microscope (Leica DM1000 LED) for the optical (PL and lasing spectra) characterizations. A 40 $\times$  objective lens was used to excite and collect light emissions

from microparticles. The recorded emission from the surface of the CsPbBr<sub>3</sub> microparticles was recorded by an optical fiber (600 μm in diameter). The optical fiber was coupled to a monochromator (Princeton Spectra Pro 2750 integrated with a Pro EM EMCCD camera with a spectral resolution of less than 0.1 nm) for spectral analysis.

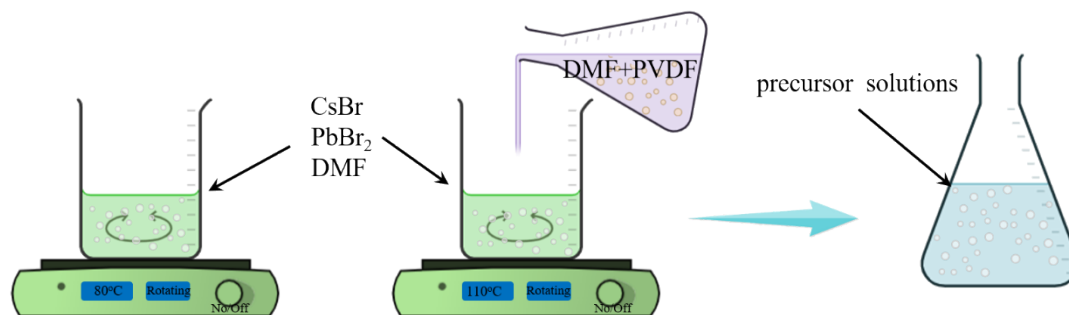

Figure S1. Schematic illustration of the method for the preparation of precursor solutions.

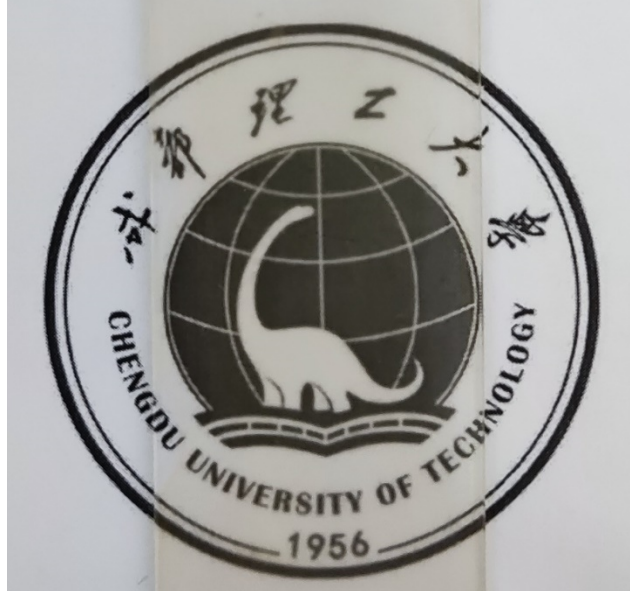

Figure S2. The photographs of CsPbBr<sub>3</sub>@PVDF composite film were recorded under sunlight.

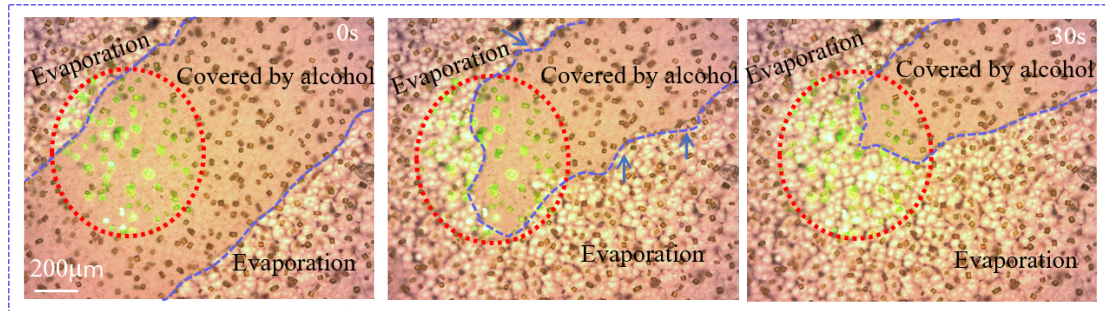

Figure S3. Luminous photographs of CsPbBr<sub>3</sub>@PVDF composite film spilled by alcohol under 800nm fs laser excitation.

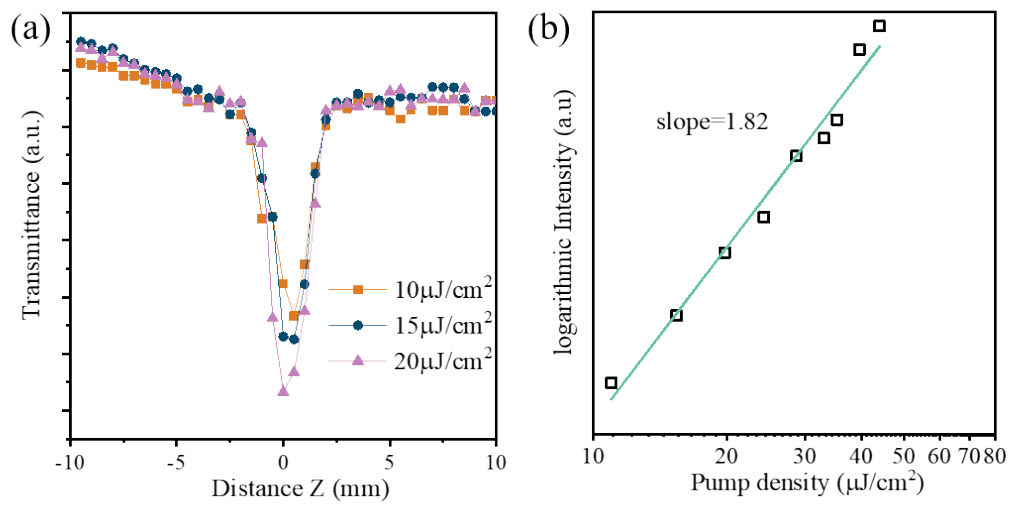

Figure S4. (a) Measured open-aperture z-scan curves and (b) emission intensities versus excitation power of the CsPbBr<sub>3</sub>@PVDF composited film.

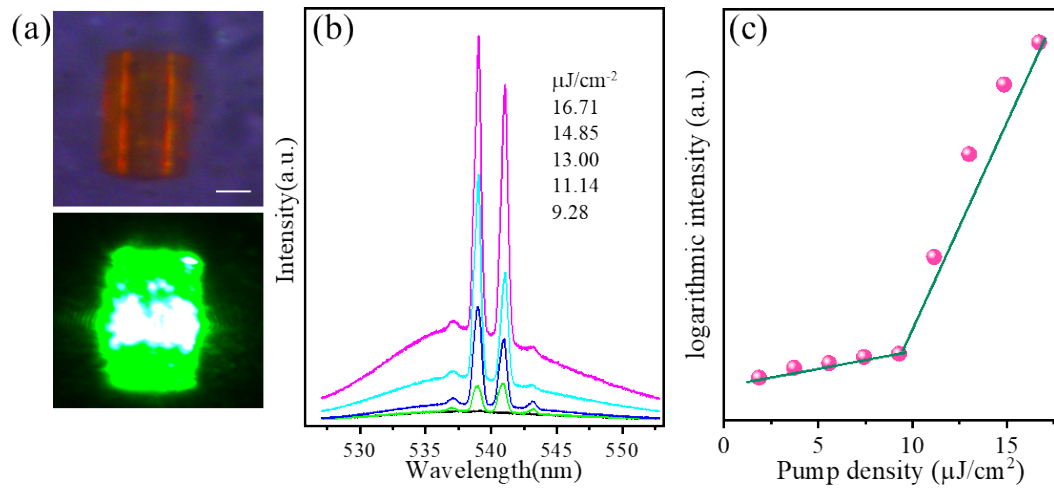

Figure S5. (a) Optical microscopy image of the CsPbBr<sub>3</sub> microcavity without and with the 400 nm fs laser excitation (scale bar is 10  $\mu\text{m}$ ). (b) Output spectra from the CsPbBr<sub>3</sub> microcavity, and the (c) corresponding integrated emitting intensity of the CsPbBr<sub>3</sub> microcavity as a function of pump density.

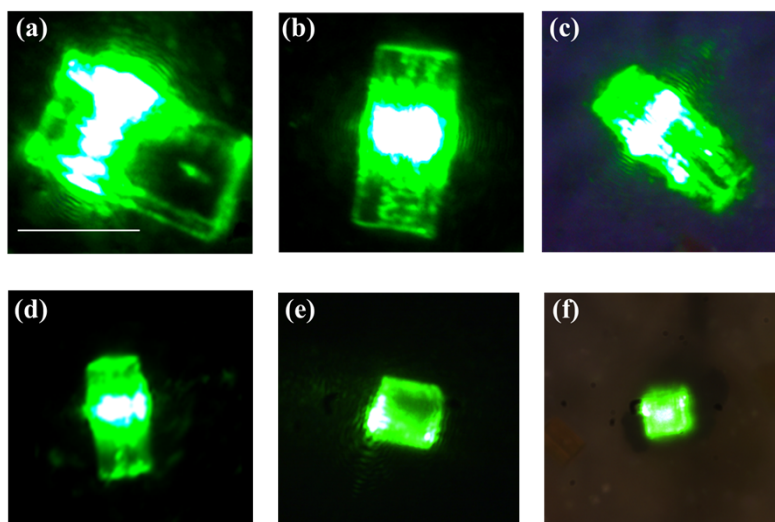

Figure S6. The enlarged lasing photograph of the PVDF wrapped CsPbBr<sub>3</sub> microparticles with width (W) is to be of 34, 20, 15, 13, 11, 8  $\mu\text{m}$  respectively, scale bar is 30 $\mu\text{m}$ .



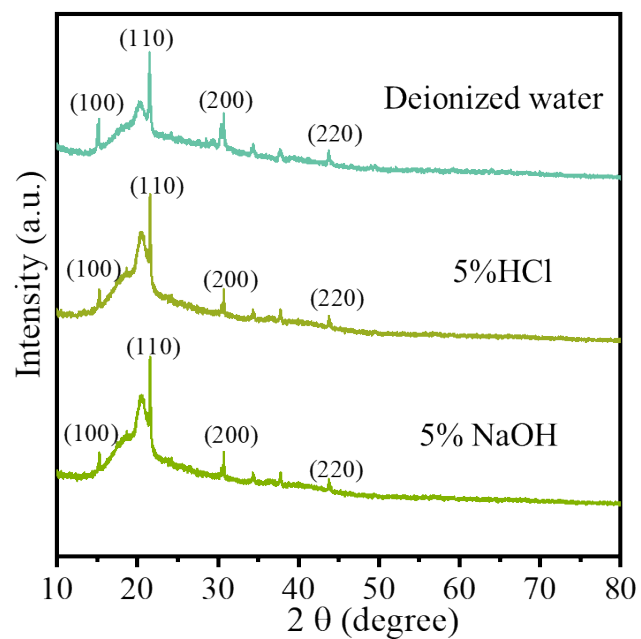

Figure S7. XRD patterns of the CsPbBr<sub>3</sub>@PVDF composite film after being immersed in water, 5% HCl and 5% NaOH for 35 days.
